# Supplementary material for: Palliative Quad Shot Radiation Therapy with or without Concurrent Immune Checkpoint Inhibition for Head and Neck Cancer
Source: MDPI journal article supplement (doi:10.3390/cancers16051049), 2024-03-05
Supplement: s1 [file s1]

**Supplementary Table S1. Univariate and multivariable analyses of factors affecting distant control.**

|                  | Univariate analysis |         | Multivariable analysis |         |
|------------------|---------------------|---------|------------------------|---------|
|                  | HR (95% CI)         | p-value | HR (95% CI)            | p-value |
| Age              | 0.972 (0.944-1.002) | .068    | 0.983 (0.951-1.017)    | .333    |
| Race             | 0.895 (0.364-2.198) | .809    | Not included           |         |
| Sex              | 0.764 (0.289-2.019) | .587    | Not included           |         |
| Primary site     | 1.015 (0.905-1.138) | .802    | Not included           |         |
| T-stage          | 0.988 (0.606-1.610) | .962    | Not included           |         |
| N-stage          | 1.416 (0.930-2.155) | .105    | 1.421 (0.905-2.231)    | .127    |
| M-stage          | 2.032 (0.941-4.388) | .071    | 1.645 (0.708-3.820)    | .247    |
| Smoking          | 1.563 (0.862-2.835) | .142    | 1.552 (0.808-2.979)    | .187    |
| ECOG PS $\geq 2$ | 0.923 (0.401-2.123) | .850    | Not included           |         |
| Surgery          | 1.355 (0.617-2.975) | .449    | Not included           |         |
| Prior ST         | 1.549 (0.676-3.546) | .301    | Not included           |         |
| Conc QS+ICI      | 1.208 (0.560-2.608) | .630    | Not included           |         |
| Prior RT         | 1.030 (0.484-2.192) | .939    | Not included           |         |
| Adjuvant ICI     | 1.509 (0.660-3.448) | .329    | Not included           |         |
| No. of QS cycles | 0.523 (0.206-1.329) | .173    | 0.671 (0.257-1.755)    | .416    |

*Abbreviations:* HR = hazard ratio; CI = confidence intervals; ECOG PS = Eastern Cooperative Oncology Group performance status; ST = systemic therapy; conc = concurrent; QS = 'Quad Shot'; ICI = immune checkpoint inhibitor; RT = radiation therapy.

**Supplementary Table S2. Univariate and multivariable analyses of factors affecting overall survival.**

|                  | Univariate analysis |         | Multivariable analysis |         |
|------------------|---------------------|---------|------------------------|---------|
|                  | HR (95% CI)         | p-value | HR (95% CI)            | p-value |
| Age              | 0.990 (0.970-1.011) | .359    | Not included           |         |
| Race             | 1.152 (0.619-2.144) | .655    | Not included           |         |
| Sex              | 0.950 (0.489-1.847) | .880    | Not included           |         |
| Primary site     | 0.903 (0.829-0.984) | .020*   | 0.925 (0.843-1.014)    | .097    |
| T-stage          | 0.919 (0.672-1.258) | .599    | Not included           |         |
| N-stage          | 1.014 (0.773-1.331) | .920    | Not included           |         |
| M-stage          | 0.563 (0.283-1.121) | .102    | 0.833 (0.398-1.746)    | .629    |
| Smoking          | 1.495 (1.004-2.226) | .048*   | 1.342 (0.882-2.040)    | .170    |
| ECOG PS $\geq 2$ | 2.198 (1.252-3.856) | .006*   | 1.844 (1.020-3.334)    | .043*   |
| Surgery          | 1.417 (0.815-2.462) | .217    | Not included           |         |
| Prior ST         | 0.980 (0.569-1.686) | .941    | Not included           |         |
| Conc QS+ICI      | 1.053 (0.615-1.805) | .850    | Not included           |         |
| Prior RT         | 0.892 (0.526-1.515) | .673    | Not included           |         |
| Adjuvant ICI     | 0.865 (0.499-1.501) | .607    | Not included           |         |
| No. of QS cycles | 0.937 (0.548-1.603) | .813    | Not included           |         |

*Abbreviations:* HR = hazard ratio; CI = confidence intervals; ECOG PS = Eastern Cooperative Oncology Group performance status; ST = systemic therapy; conc = concurrent; QS = 'Quad Shot'; ICI = immune checkpoint inhibitor; RT = radiation therapy.

\* Considered statistically significant based on *P*-value <.050.
